# Supplementary material for: Wolbachia Interferes with Ferritin Expression and Iron Metabolism in Insects
Source: PubMed Central journal article supplement (PMC2759286; doi:10.1371/journal.ppat.1000630), 2009-10-23

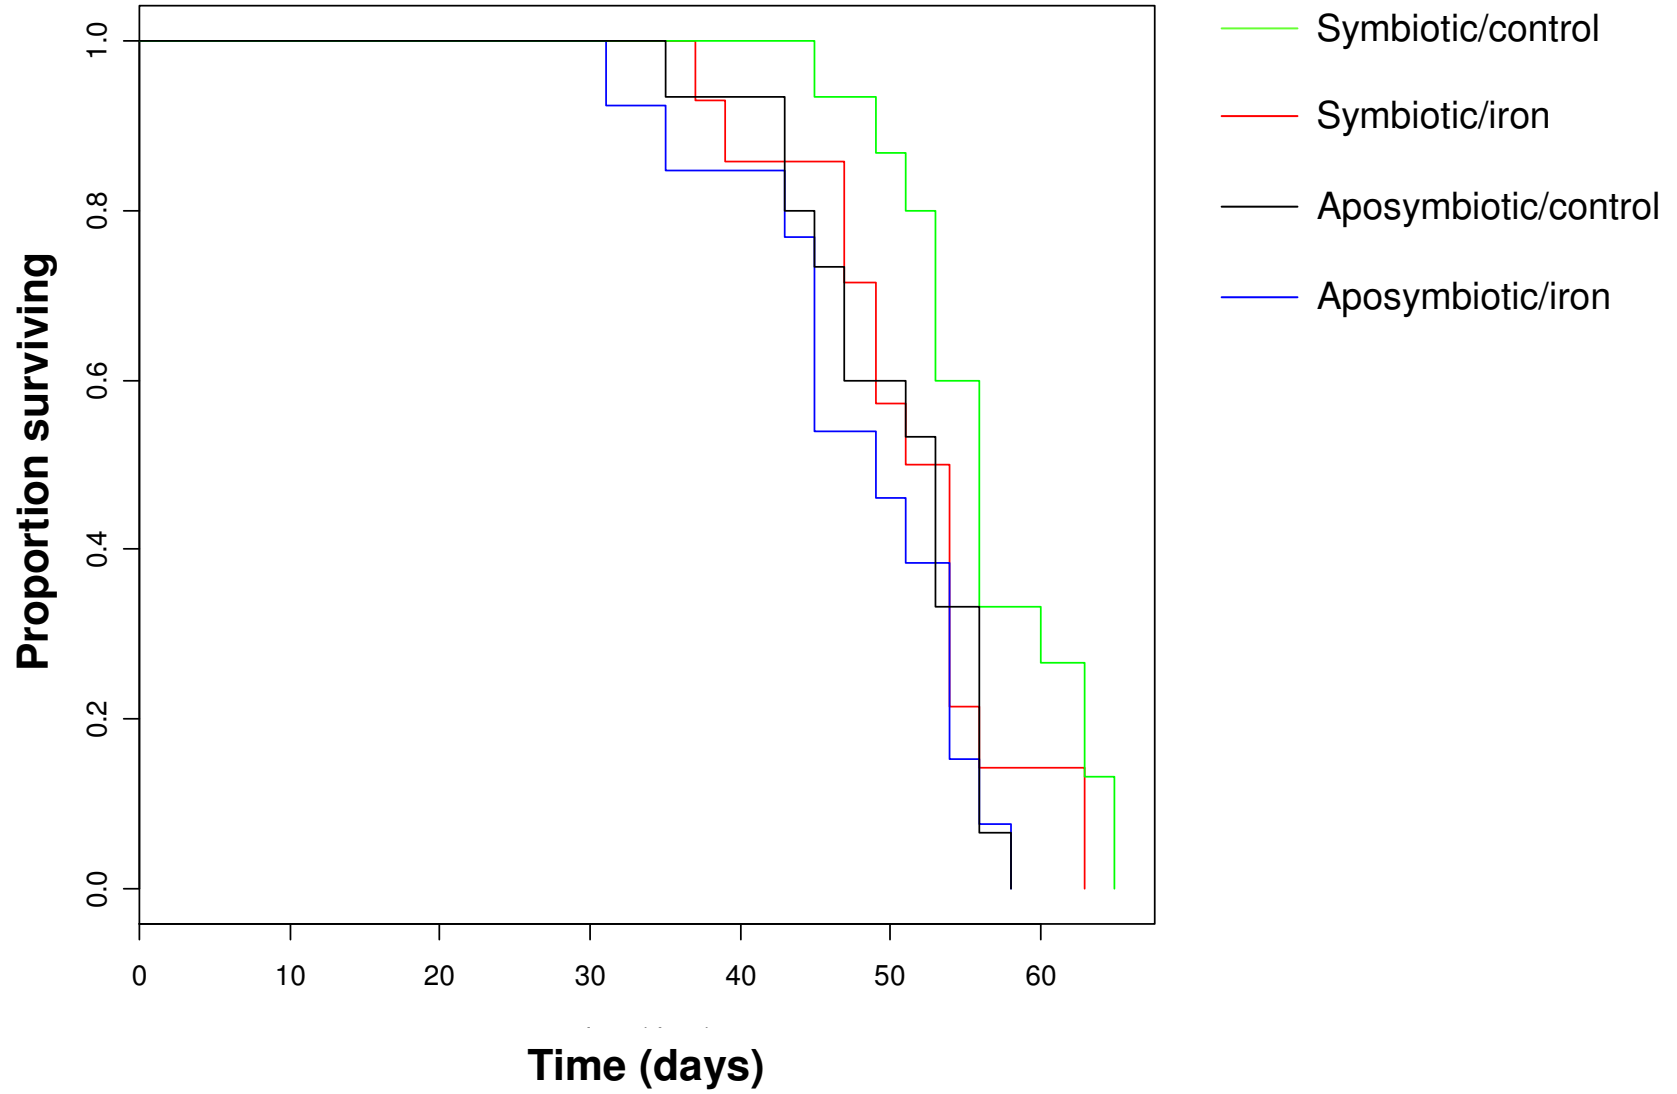

Supplement: ppat.1000630.s001.pdf [file ppat.1000630.s001.pdf]
